# Supplementary material
Source: Springer Nature journal article supplement (https://www.springermedizin.de/resource/supplementary/13002_2009_156_MOESM4_ESM.pdf/9627282)

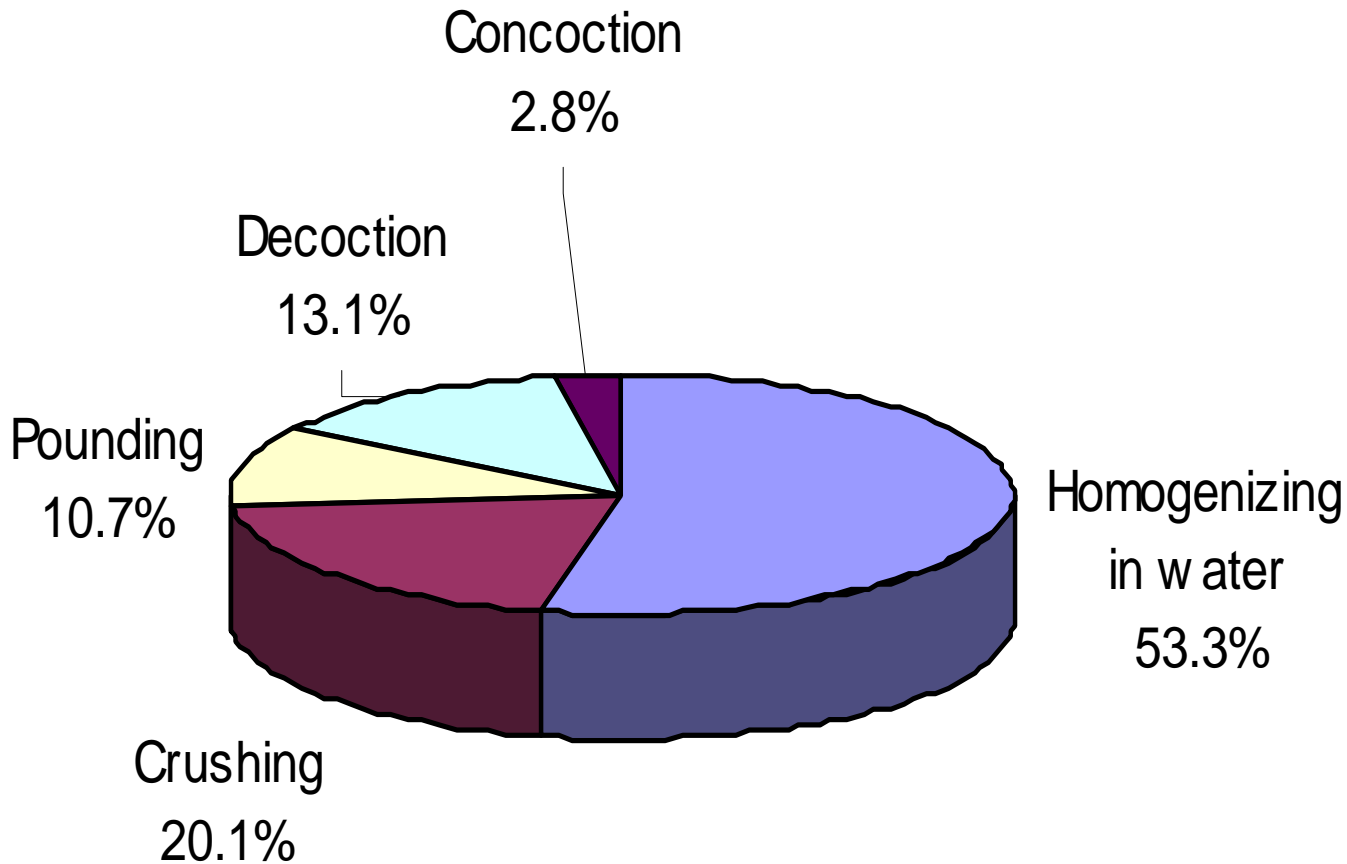

Supplement: MOESM4 [file 9627282]
